# Supplementary material for: Working Life Expectancy at Age 50 in the United States and the Impact of the Great Recession
Source: Springer Nature journal article supplement (doi:10.1007/s13524-017-0619-6), 2017-10-10
Supplement: MOESM1 [file 15125700]

## **Online Resource 1**

Working Life Expectancy at Age 50 in the US and the Impact of  
the Great Recession

## **Descriptives on numbers of transitions by race/ethnicity and education**

Table A1 shows counts of transitions from starting state  $j$  at  $t$  to outcome state  $i$  at  $t + 1$  by gender, race/ethnicity, and education. Starting states  $i$  are given in rows, while outcome states  $j$  are given in columns. For instance, for white males, 1317 transitions from the state “Out of the labor force/unemployed” to the state “Retired” are observed.

**Table A1:** Number of transitions from starting state at  $t$  to outcome state at  $t + 1$  by gender, race/ethnicity, and education.

|                     |                    | Out of labor force | Retired | Employed | Dead |
|---------------------|--------------------|--------------------|---------|----------|------|
| White, male         | Out of labor force | 4230               | 1317    | 1199     | 155  |
|                     | Retired            | 328                | 44083   | 1113     | 2359 |
|                     | Employed           | 1854               | 2530    | 35331    | 450  |
| White, female       | Out of labor force | 13787              | 2532    | 1450     | 196  |
|                     | Retired            | 854                | 62475   | 823      | 2736 |
|                     | Employed           | 2150               | 2320    | 32788    | 194  |
| Black, male         | Out of labor force | 1660               | 317     | 221      | 78   |
|                     | Retired            | 105                | 6792    | 155      | 445  |
|                     | Employed           | 332                | 374     | 4847     | 72   |
| Black, female       | Out of labor force | 3770               | 649     | 329      | 117  |
|                     | Retired            | 252                | 11581   | 212      | 555  |
|                     | Employed           | 504                | 548     | 7179     | 61   |
| Hispanic, male,     | Out of labor force | 973                | 179     | 200      | 31   |
|                     | Retired            | 42                 | 4061    | 90       | 193  |
|                     | Employed           | 288                | 244     | 3494     | 24   |
| Hispanic, female    | Out of labor force | 3387               | 436     | 236      | 51   |
|                     | Retired            | 147                | 5647    | 40       | 196  |
|                     | Employed           | 298                | 160     | 2988     | 12   |
| No degree, male     | Out of labor force | 2550               | 566     | 366      | 112  |
|                     | Retired            | 150                | 17003   | 289      | 1231 |
|                     | Employed           | 578                | 679     | 7506     | 128  |
| No degree, female   | Out of labor force | 7911               | 1183    | 407      | 174  |
|                     | Retired            | 401                | 23742   | 194      | 1475 |
|                     | Employed           | 609                | 515     | 6299     | 70   |
| High school, male   | Out of labor force | 3433               | 898     | 831      | 123  |
|                     | Retired            | 235                | 26904   | 704      | 1343 |
|                     | Employed           | 1282               | 1620    | 21401    | 285  |
| High school, female | Out of labor force | 11215              | 1985    | 1263     | 169  |
|                     | Retired            | 716                | 44165   | 618      | 1684 |
|                     | Employed           | 1778               | 1801    | 25420    | 154  |
| College, male       | Out of labor force | 1106               | 385     | 472      | 35   |
|                     | Retired            | 98                 | 12057   | 382      | 472  |
|                     | Employed           | 676                | 911     | 15782    | 151  |
| College, female     | Out of labor force | 2412               | 533     | 416      | 29   |
|                     | Retired            | 166                | 13106   | 278      | 373  |
|                     | Employed           | 646                | 755     | 12175    | 51   |

## **Results of the multinomial logistic regressions**

Tables A2 to A9 show estimates of the coefficients of the multinomial logistic regressions. Results for the male and female total population are given in tables A2 and A3, estimates for white males and females are included in tables A4 and A5, results for blacks are given in tables A6 (males) and A7 (females), and results for Hispanics are shown in tables A8 and A9. Note that in all models age is included as a smoothing spline. More detailed results are available upon request from the authors.

The estimates presented in the tables are used to calculate transition probabilities. These probabilities are then adjusted to match CDC life tables (see next section) and collected in transition matrices, which are used to estimate working life expectancy and other quantities. The transition matrices are available online. Figures A1 and A2 show some transition probabilities for males and females by age and period. More specifically, in both figures the leftmost panel shows the probability of staying employed; the middle panel shows the probability of retiring, combining both employed individuals and individuals who are unemployed or out of the labor force; and the rightmost panel shows the probability of returning to employment if retired.

**Table A2:** Coefficients of the multinomial logistic regression for males

|                              | Dead    | Inactive | Retired |
|------------------------------|---------|----------|---------|
| Intercept                    | -10.217 | 5.129    | -5.618  |
| i=Retired                    | 1.129   | -1.883   | 2.712   |
| i=Employed                   | -3.071  | -4.242   | -3.035  |
| Age (spline)                 | —       | —        | —       |
| Period 1998-2002             | 0.433   | 0.142    | 0.029   |
| Period 2003-2007             | 0.338   | 0.285    | 0.004   |
| Period 2008-2010             | 0.426   | 0.480    | 0.163   |
| Age 62                       | 0.018   | 0.283    | 0.955   |
| Age 65                       | 0.305   | -0.065   | 1.232   |
| Age 66                       | -0.456  | 0.017    | 0.962   |
| Age >66                      | -0.102  | -0.041   | 0.548   |
| No degree                    | -0.558  | -0.455   | 0.180   |
| High school degree           | -1.077  | -0.912   | -0.017  |
| No degree/1998-2002          | -0.026  | 0.091    | 0.145   |
| No degree/2003-2007          | -0.104  | -0.039   | 0.044   |
| No degree/2008-2010          | -0.337  | -0.032   | -0.076  |
| High school degree/1998-2002 | -0.045  | 0.213    | 0.282   |
| High school degree/2003-2007 | -0.318  | -0.200   | -0.099  |
| High school degree/2008-2010 | -0.456  | 0.032    | 0.028   |
| No degree/age 62             | 0.447   | -0.007   | -0.33   |
| No degree/age 65             | 0.322   | 0.111    | -0.536  |
| No degree/age 66             | 0.776   | 0.047    | -0.395  |
| No degree/age >66            | 0.425   | 0.365    | -0.296  |
| High school degree/age 62    | 0.297   | -0.128   | -0.562  |
| High school degree/age 65    | 0.672   | 0.489    | -0.809  |
| High school degree/age 66    | 1.128   | 0.379    | -0.566  |
| High school degree/age >66   | 0.522   | 0.705    | -0.392  |

**Table A3:** Coefficients of the multinomial logistic regression for females

|                              | Dead    | Inactive | Retired |
|------------------------------|---------|----------|---------|
| Intercept                    | -13.646 | 0.036    | -0.313  |
| i=Retired                    | 7.255   | 0.175    | -0.131  |
| i=Employed                   | -7.228  | 0.936    | -0.139  |
| Age (spline)                 | —       | —        | —       |
| Period 1998-2002             | -1.681  | 0.411    | -0.028  |
| Period 2003-2007             | 2.680   | 0.374    | 0.022   |
| Period 2008-2010             | -3.706  | -0.332   | -0.527  |
| Age 62                       | -4.824  | -0.395   | 0.076   |
| Age 65                       | -3.414  | 0.060    | -0.617  |
| Age 66                       | 0.188   | -0.735   | 0.091   |
| Age >66                      | -0.082  | -0.772   | 0.644   |
| No degree                    | 0.119   | 0.241    | -0.265  |
| High school degree           | 0.491   | -0.234   | 0.006   |
| No degree/1998-2002          | 0.324   | -0.279   | 0.390   |
| No degree/2003-2007          | 0.218   | -0.104   | -0.227  |
| No degree/2008-2010          | 0.466   | -0.288   | -0.578  |
| High school degree/1998-2002 | 0.368   | -0.369   | 0.039   |
| High school degree/2003-2007 | 0.027   | -0.081   | -0.275  |
| High school degree/2008-2010 | 0.352   | -0.157   | -1.058  |
| No degree/age 62             | 0.175   | -0.129   | 0.652   |
| No degree/age 65             | 0.113   | -0.014   | -0.363  |
| No degree/age 66             | 0.245   | -0.240   | -0.904  |
| No degree/age >66            | 0.440   | -0.350   | 0.390   |
| High school degree/age 62    | 0.559   | -0.195   | -0.751  |
| High school degree/age 65    | 0.580   | -0.413   | 0.259   |
| High school degree/age 66    | 0.395   | -0.404   | 0.411   |
| High school degree/age >66   | 1.142   | -0.289   | -0.373  |

**Table A4:** Coefficients of the multinomial logistic regression for white males

|                              | Dead    | Inactive | Retired |
|------------------------------|---------|----------|---------|
| Intercept                    | -10.534 | -0.517   | -0.607  |
| i=Retired                    | 5.080   | -0.016   | -0.099  |
| i=Employed                   | -5.508  | 0.763    | -0.146  |
| Age (spline)                 | —       | —        | —       |
| Period 1998-2002             | -1.856  | -0.123   | -0.045  |
| Period 2003-2007             | 2.716   | 0.262    | -0.210  |
| Period 2008-2010             | -2.946  | -0.684   | 0.412   |
| Age 62                       | -4.176  | -0.425   | 0.314   |
| Age 65                       | -3.025  | 0.052    | -0.122  |
| Age 66                       | 0.141   | -1.255   | 0.738   |
| Age >66                      | -0.060  | -0.842   | 0.097   |
| No degree                    | 0.086   | -0.097   | -0.209  |
| High school degree           | 0.507   | -0.110   | 0.724   |
| No degree/1998-2002          | 0.196   | 0.024    | 0.496   |
| No degree/2003-2007          | 0.102   | 0.096    | -0.006  |
| No degree/2008-2010          | 0.416   | -0.171   | 0.353   |
| High school degree/1998-2002 | 0.297   | -0.048   | -0.257  |
| High school degree/2003-2007 | 0.124   | -0.051   | -0.517  |
| High school degree/2008-2010 | 0.604   | -0.514   | 0.633   |
| No degree/age 62             | 0.619   | -0.207   | 0.527   |
| No degree/age 65             | 0.344   | -0.266   | -0.490  |
| No degree/age 66             | 0.070   | -0.055   | 1.304   |
| No degree/age >66            | 0.376   | 0.154    | 0.418   |
| High school degree/age 62    | 0.868   | 0.195    | -0.395  |
| High school degree/age 65    | 0.211   | -0.37    | 0.851   |
| High school degree/age 66    | -0.26   | -0.190   | 0.777   |
| High school degree/age >66   | 0.794   | -0.215   | -0.123  |

**Table A5:** Coefficients of the multinomial logistic regression for white females

|                              | Dead   | Inactive | Retired |
|------------------------------|--------|----------|---------|
| Intercept                    | -13.94 | 0.047    | -0.564  |
| i=Retired                    | 7.212  | 0.280    | -0.300  |
| i=Employed                   | -7.063 | 0.659    | -0.389  |
| Age (spline)                 | —      | —        | —       |
| Period 1998-2002             | -1.738 | 0.283    | 0.002   |
| Period 2003-2007             | 2.704  | 0.223    | 0.038   |
| Period 2008-2010             | -3.611 | -0.346   | -0.488  |
| Age 62                       | -4.794 | -0.377   | 0.302   |
| Age 65                       | -3.390 | 0.020    | -0.368  |
| Age 66                       | 0.189  | -0.992   | 0.140   |
| Age >66                      | -0.082 | -0.730   | 0.559   |
| No degree                    | 0.117  | 0.162    | 0.036   |
| High school degree           | 0.521  | -0.305   | 0.158   |
| No degree/1998-2002          | 0.344  | -0.335   | 0.517   |
| No degree/2003-2007          | 0.297  | -0.212   | -0.041  |
| No degree/2008-2010          | 0.583  | -0.442   | -0.059  |
| High school degree/1998-2002 | 0.336  | -0.361   | 0.131   |
| High school degree/2003-2007 | 0.146  | -0.206   | -0.181  |
| High school degree/2008-2010 | 0.596  | -0.432   | -0.626  |
| No degree/age 62             | 0.262  | -0.248   | 0.874   |
| No degree/age 65             | 0.324  | -0.243   | -0.015  |
| No degree/age 66             | 0.140  | -0.335   | -0.476  |
| No degree/age >66            | 0.405  | -0.404   | 0.395   |
| High school degree/age 62    | 0.532  | -0.265   | -0.414  |
| High school degree/age 65    | 0.555  | -0.554   | 0.607   |
| High school degree/age 66    | 0.199  | -0.433   | 0.519   |
| High school degree/age >66   | 0.944  | -0.415   | -0.172  |



**Table A6:** Coefficients of the multinomial logistic regression for black males

|                              | Dead   | Inactive | Retired |
|------------------------------|--------|----------|---------|
| Intercept                    | -7.553 | -0.802   | -1.262  |
| i=Retired                    | 5.651  | -0.867   | -0.228  |
| i=Employed                   | -4.306 | 0.827    | 0.092   |
| Age (spline)                 | —      | —        | —       |
| Period 1998-2002             | -1.870 | -0.202   | -0.082  |
| Period 2003-2007             | 2.544  | 0.581    | -0.135  |
| Period 2008-2010             | -3.842 | -0.325   | -0.066  |
| Age 62                       | -4.843 | -0.510   | -0.182  |
| Age 65                       | -3.347 | -0.018   | -0.476  |
| Age 66                       | 0.104  | 0.189    | 1.432   |
| Age >66                      | -0.057 | -0.852   | 0.293   |
| No degree                    | 0.074  | -0.500   | -0.441  |
| High school degree           | 0.461  | 0.079    | 0.298   |
| No degree/1998-2002          | 0.119  | 0.336    | 0.228   |
| No degree/2003-2007          | -0.007 | 0.131    | -0.205  |
| No degree/2008-2010          | 0.447  | -0.414   | -1.129  |
| High school degree/1998-2002 | 0.350  | -0.098   | -0.371  |
| High school degree/2003-2007 | -0.117 | -0.025   | -0.655  |
| High school degree/2008-2010 | 0.641  | -0.655   | 1.204   |
| No degree/age 62             | 0.347  | 0.374    | 1.608   |
| No degree/age 65             | -0.024 | 0.331    | 0.024   |
| No degree/age 66             | 0.023  | -0.638   | 0.281   |
| No degree/age >66            | 0.280  | 0.637    | 1.598   |
| High school degree/age 62    | 0.755  | 1.185    | -0.229  |
| High school degree/age 65    | 0.194  | -1.069   | -0.468  |
| High school degree/age 66    | 0.028  | -0.838   | 0.098   |
| High school degree/age >66   | 1.410  | 0.135    | -0.358  |

**Table A7:** Coefficients of the multinomial logistic regression for black females

|                              | Dead    | Inactive | Retired |
|------------------------------|---------|----------|---------|
| Intercept                    | -11.023 | -0.375   | -0.088  |
| i=Retired                    | 7.765   | -0.465   | 0.107   |
| i=Employed                   | -6.127  | 1.085    | 0.423   |
| Age (spline)                 | —       | —        | —       |
| Period 1998-2002             | -1.723  | 0.238    | -0.010  |
| Period 2003-2007             | 2.336   | 0.457    | 0.226   |
| Period 2008-2010             | -4.279  | -0.266   | -0.564  |
| Age 62                       | -5.089  | -0.487   | -0.435  |
| Age 65                       | -3.531  | -0.088   | -0.930  |
| Age 66                       | 0.164   | 0.110    | 0.323   |
| Age >66                      | -0.088  | -0.982   | 1.073   |
| No degree                    | 0.107   | 0.329    | -0.173  |
| High school degree           | 0.550   | 0.036    | -0.477  |
| No degree/1998-2002          | 0.268   | -0.111   | 0.377   |
| No degree/2003-2007          | 0.046   | 0.130    | -0.228  |
| No degree/2008-2010          | 0.340   | 0.332    | -2.260  |
| High school degree/1998-2002 | 0.509   | -0.319   | -0.204  |
| High school degree/2003-2007 | -0.260  | 0.185    | -0.442  |
| High school degree/2008-2010 | 0.222   | 0.282    | -19.330 |
| No degree/age 62             | 0.388   | -0.041   | 0.144   |
| No degree/age 65             | -0.034  | 0.082    | -1.789  |
| No degree/age 66             | -0.131  | 0.026    | -1.930  |
| No degree/age >66            | 0.415   | 0.173    | 0.112   |
| High school degree/age 62    | 0.335   | 0.131    | -0.843  |
| High school degree/age 65    | 0.292   | -0.279   | -0.355  |
| High school degree/age 66    | 0.475   | -0.187   | 0.626   |
| High school degree/age >66   | 1.403   | 0.080    | -0.638  |

**Table A8:** Coefficients of the multinomial logistic regression for Hispanic males

|                              | Dead    | Inactive | Retired |
|------------------------------|---------|----------|---------|
| Intercept                    | -12.066 | -0.776   | 0.278   |
| i=Retired                    | 5.216   | 0.930    | 0.261   |
| i=Employed                   | -9.564  | 1.079    | 0.024   |
| Age (spline)                 | —       | —        | —       |
| Period 1998-2002             | -2.397  | 0.476    | -0.378  |
| Period 2003-2007             | 2.584   | 1.107    | -1.243  |
| Period 2008-2010             | -3.874  | -0.604   | 1.105   |
| Age 62                       | -4.161  | -0.282   | -0.637  |
| Age 65                       | -2.931  | 0.999    | -1.855  |
| Age 66                       | 0.175   | -1.866   | 0.901   |
| Age >66                      | -0.061  | -1.189   | -0.002  |
| No degree                    | 0.143   | 0.070    | -1.571  |
| High school degree           | 0.216   | 0.462    | 0.000   |
| No degree/1998-2002          | 0.028   | 0.056    | -0.009  |
| No degree/2003-2007          | -0.158  | 0.104    | -1.376  |
| No degree/2008-2010          | 0.097   | 0.201    | 0.984   |
| High school degree/1998-2002 | 0.170   | -0.251   | 0.921   |
| High school degree/2003-2007 | -0.197  | 0.107    | -0.132  |
| High school degree/2008-2010 | 0.121   | 0.073    | -12.097 |
| No degree/age 62             | 0.382   | 0.215    | 0.502   |
| No degree/age 65             | -0.020  | -0.162   | -0.742  |
| No degree/age 66             | -0.847  | -0.447   | -12.053 |
| No degree/age >66            | 0.152   | 0.101    | -0.306  |
| High school degree/age 62    | 1.386   | -0.132   | -1.116  |
| High school degree/age 65    | 0.002   | 0.456    | 1.065   |
| High school degree/age 66    | 0.322   | -0.149   | 1.564   |
| High school degree/age >66   | 2.133   | -0.531   | -0.512  |

**Table A9:** Coefficients of the multinomial logistic regression for Hispanic females

|                              | Dead    | Inactive | Retired |
|------------------------------|---------|----------|---------|
| Intercept                    | -18.828 | 0.159    | -2.782  |
| i=Retired                    | 5.372   | 0.286    | 0.110   |
| i=Employed                   | -12.683 | 0.839    | -1.036  |
| Age (spline)                 | —       | —        | —       |
| Period 1998-2002             | -1.293  | 0.753    | 0.396   |
| Period 2003-2007             | 2.772   | 0.194    | 0.948   |
| Period 2008-2010             | -3.892  | -0.164   | -31.931 |
| Age 62                       | -4.805  | -0.633   | 0.139   |
| Age 65                       | -3.464  | -0.121   | -0.502  |
| Age 66                       | 0.261   | 1.567    | 0.643   |
| Age >66                      | -0.048  | -0.799   | 0.964   |
| No degree                    | 0.207   | 1.035    | -0.235  |
| High school degree           | 0.782   | -1.241   | 0.354   |
| No degree/1998-2002          | 0.240   | 0.075    | 0.292   |
| No degree/2003-2007          | 0.289   | -0.086   | 0.070   |
| No degree/2008-2010          | 0.749   | -1.340   | -1.214  |
| High school degree/1998-2002 | 0.331   | -0.352   | -0.361  |
| High school degree/2003-2007 | 0.289   | -0.359   | -0.242  |
| High school degree/2008-2010 | 0.629   | -1.274   | -0.860  |
| No degree/age 62             | -0.037  | 0.002    | 0.289   |
| No degree/age 65             | 0.116   | 0.057    | -2.359  |
| No degree/age 66             | 0.773   | -1.449   | -32.750 |
| No degree/age >66            | 0.446   | -0.416   | 0.850   |
| High school degree/age 62    | 0.473   | -1.431   | -1.082  |
| High school degree/age 65    | 0.733   | -1.406   | 0.386   |
| High school degree/age 66    | 0.581   | 0.025    | 0.479   |
| High school degree/age >66   | 0.975   | -0.874   | 0.548   |

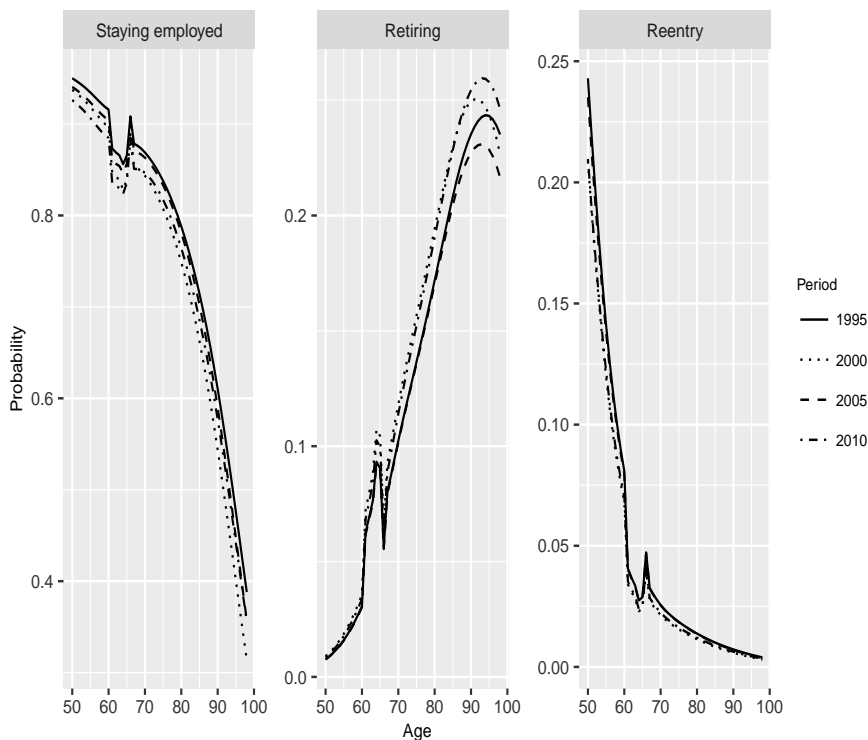

**Fig. A1** Age-specific probabilities of staying employed, retiring, and reentry to the labor market for males by period. Source: Own calculations based on the Health and Retirement Study, years 1992-2012.

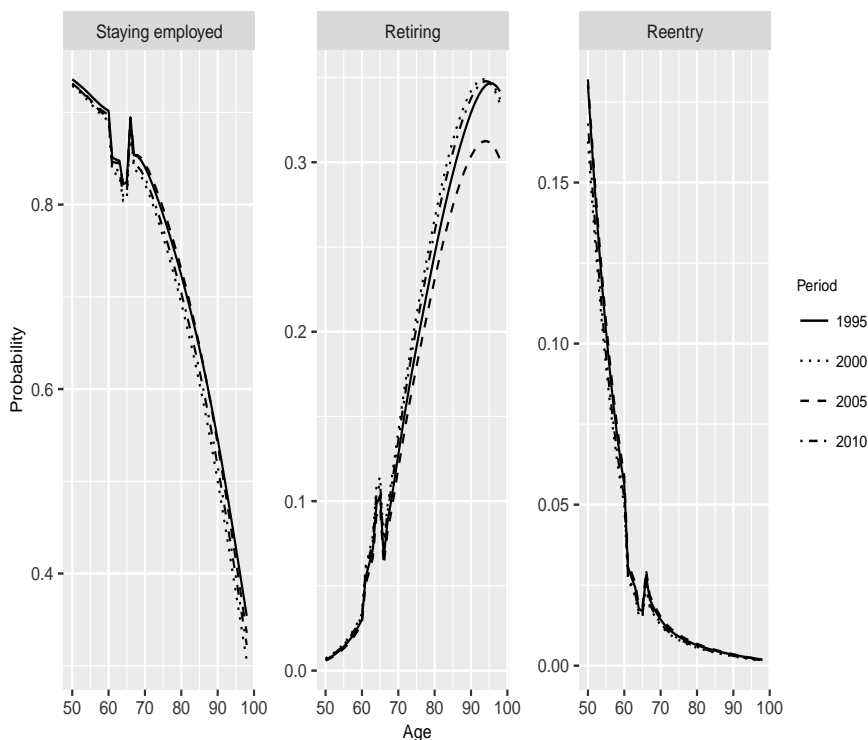

**Fig. A2** Age-specific probabilities of staying employed, retiring, and reentry to the labor market for females by period. Source: Own calculations based on the Health and Retirement Study, years 1992-2012.

## Mortality estimation and correction

### Mortality estimation for Hispanics

To adjust our survival estimates, we use CDC life tables for the years 1995 (National Center for Health Statistics 1998), 2000 (Arias 2002), 2005 (Arias et al. 2010), and 2010 (Arias 2014) for the periods of 1993-1997, 1998-2002, 2003-2007, and 2008-2011, respectively. Because the CDC does not supply life tables for Hispanics for the years 1995, 2000, and 2005, we used the life tables for Hispanics for the years 2006 and 2010, and estimated the missing years by assuming that mortality differentials between Hispanics and whites and blacks for 2005/2006 and 2010 also prevailed in 1995 and 2000. More technically, the logarithm of age-specific probabilities of dying for the years 2005 and 2010 were used as a dependent variable in a linear regression, with a cubic age polynomial and log probabilities of dying of whites and blacks as explanatory variables. Regressions were run separately for males and females. These models exhibit good predictive qualities. For example, in the regression model for women  $R^2$  is close to 1 and the relative prediction error is less than 0.01. Parameter estimates were used to estimate log probabilities of dying for the years 1995 and 2000.

Before the regression approach outlined above could be applied another estimation step was needed, as the CDC life tables for whites and blacks for 1995 end with age 85. In this case also a regression approach was used to estimate probabilities of dying for ages 85 to 99. Log probabilities of dying for ages 85 to 99 of the years 2000, 2005, and 2010 were used as dependent variables. Explanatory variables included a cubic age polynomial and survival at age 85. Parameter estimates were used to estimate log probabilities of dying for 1995.

### Mortality correction: Matching with CDC life tables

Matching mortality with CDC life tables works as follows. Let  $p(x, e) = p(e|x, e) + p(o|x, e) + p(r|x, e)$  denote the probability that an employed individual aged  $x$  survives, where  $e$  represents the labor force status employed,  $o$  represents the status out of the labor force or unemployed, and  $r$  represents the status retired. Then, for instance,  $p(r|x, e)$  is the probability of being in the state retired at age  $x + 1$  conditional on being employed at age  $x$ .  $p(x, o)$  and  $p(x, r)$  denote the survival probabilities for individuals who are, respectively, out of the labor force and retired, and can be decomposed in a similar manner. These probabilities are estimated using HRS data as described in the main text.  $p_{\text{CDC}}(x)$  denotes the survival probability for age  $x$  reported by the CDC.  $d(x, e)$ ,  $d(x, o)$ , and  $d(x, r)$  denote the proportion of individuals at age  $x$  who are, respectively, employed, out of the labor force or unemployed, and retired. Given a starting distribution for the youngest age  $d_S(50, j)$ , the proportions  $d(x, j)$  for any age  $x$  can be calculated by the repeated application of the transition probabilities.

Ensuring that the working life tables imply the same life expectancy as the life tables of the CDC requires that

$$p(x, e)d(x, e) + p(x, o)d(x, o) + p(x, r)d(x, r) = p_{\text{CDC}}(x) \quad (1)$$

holds. This simply means that average survival follows the CDC life table. To achieve this, the following algorithm was applied, where  $p_{\text{est}}$  is used to indicate estimated probabilities

derived from the multinomial logit model, and  $p_{adj}$  is used to denote adjusted values; e.g.,  $p_{est}(x, o)$  is the survival probabilities for individuals out of the labor force and aged  $x$  as derived from the multinomial logistic regression (see previous section). The algorithm works as follows:

1. Set  $d(50, e) = w_e(50)$ ,  $d(50, o) = w_o(50)$ ,  $d(50, r) = w_r(50)$ , where  $w_j(50)$  denotes the weights described in the methods section.

2. For each  $x = 50, \dots, 98$ :

(a) Calculate

$$a(x) = \frac{p_{est}(x, e)d(x, e) + p_{est}(x, o)d(x, o) + p_{est}(x, r)d(x, r)}{p_{CDC}(x)}$$

(b) Calculate  $p'(x, j) = p_{est}(x, j)/a(x)$  for  $j = e, o, r$

i. If any  $p'(x, j) > 1$  set  $p_{adj}(x, j) = p_{CDC}(x)$  for  $j = e, o, r$

ii. Else set  $p_{adj}(x, j) = p'(x, j)$  for  $j = e, o, r$

(c) Calculate

$$b(x, j) = \frac{p_{est}(e|x, j) + p_{est}(o|x, j) + p_{est}(r|x, j)}{p_{adj}(x, j)}$$

for  $j = e, o, r$

(d) Set  $p_{adj}(e|x, j) = p_{est}(e|x, j)/b(x, j)$ ,  $p_{adj}(o|x, j) = p_{est}(o|x, j)/b(x, j)$ , and  $p_{adj}(r|x, j) = p_{est}(r|x, \cdot)/b(x, j)$  for  $j = e, o, r$

(e) Set  $d(x+1, j) = d(x, e)p_{adj}(j|x, e) + d(x, o)p_{adj}(j|x, o) + d(x, r)p_{adj}(j|x, r)$  for  $j = e, o, r$

3. Set  $p_{adj}(99, j) = 0$  for  $j = e, o, r$

Essentially, this algorithm guarantees that equation (1) is fulfilled by scaling survival probability estimates  $p_{est}(x, e)$ ,  $p_{est}(x, r)$ , and  $p_{est}(x, o)$  up or down by a multiplicative age-specific scaling factor  $a(x)$ . The remaining age-specific transition probabilities, e.g., the probability of retiring, are scaled up or down accordingly. More specifically, the single steps do the following:

- Step 1 states that the algorithm starts with age 50 and sets the weights of each of the three states equal to its empirical proportion.
- $a(x)$  as calculated in step 2.a) is the ratio of the survival probability at age  $x$  estimated from the HRS to the survival probability obtained from the CDC. For instance, if the survival probability obtained from the the CDC equals 0.95 and the survival estimate of the HRS equals 0.96,  $a(x)$  will be around 1.011. This means that the HRS estimate is roughly 1% higher than the CDC value.
- Step 2.b) rescales survival probabilities from the HRS using the inverse of  $a(x)$ . Continuing the example from above where  $a(x) \approx 1.011$ , the inverse of  $a(x)$  equals 0.99, meaning that the state-specific survival estimates of the HRS will be scaled down.

- Because in a few cases step 2.b) may result in state-specific survival probabilities above one, step 2.b)i is introduced. For instance, assume that the probability for survival according to the CDC is 0.98, while the HRS estimate equals 0.95, such that  $a(x) \approx 0.969$  and  $1/a(x) \approx 1.032$ . Further assume that the survival probability conditional on being employed equals 0.99. In this case  $p'(x, e) \approx 0.99/0.969 \approx 1.022$ . Step 2.b)i then sets all state specific survival probabilities equal to the CDC value.
- Steps 2.c) and 2.d) are needed because survival can be broken down into the transition probabilities of moving to the employed state, moving to retirement, and moving to “out of the labor force or unemployed”. Step 2.c) calculates a scaling factor similar to that of step 2.a), which adjusts the just mentioned transition probabilities such that adding them up with the adjusted survival probability yields 1. This is implemented in step 2.d), similar to step 2.b).
- Step 2.e) updates the distribution of states according to adjusted transition probabilities. The algorithm then moves to the next age, and the updated distribution is used in step 2. The updating of the distribution thus ensures that the algorithm keeps track of the composition of the population.
- The final step 3 implements the assumption that age 99 is the oldest possible age.



**Table A10:** Results of the decomposition of gender gaps by race/ethnicity, racial/ethnic differences by gender, and educational differences by gender; 2008-2011.

|                      |          | Total | Same weights | Mortality | Transitions |
|----------------------|----------|-------|--------------|-----------|-------------|
| Male/female          | White    | 1.8   | 1.3          | -0.5      | 1.8         |
|                      | Black    | 0.3   | 0.1          | -0.4      | 0.5         |
|                      | Hispanic | 1.1   | 0.2          | -0.3      | 0.5         |
| White/black          | Males    | 4.1   | 3.2          | 0.6       | 2.6         |
|                      | Females  | 2.6   | 2.0          | 0.3       | 1.7         |
| White/Hispanic       | Males    | 2.8   | 2.4          | -0.2      | 2.5         |
|                      | Females  | 2.1   | 1.2          | -0.1      | 1.3         |
| College/less than HS | Males    | 6.8   | 6.4          | 1.4       | 5.0         |
|                      | Females  | 5.4   | 4.9          | 0.5       | 4.5         |
| College/HS           | Males    | 3.4   | 3.1          | 0.7       | 2.5         |
|                      | Females  | 2.1   | 2.1          | 0.2       | 1.8         |

Notes: HS=High school.

Source: Own calculations based on the Health and Retirement Study, years 1992-2012.

## The differential contributions of mortality and employment to differences in WLE

We assessed the contribution of mortality and employment to selected differences in WLE using decomposition techniques, focusing on the period of 2008-2011 and on comparisons across sub-populations. As our results on WLE depend not only on survival and transition probabilities, but also on the weights described in the methods section, we proceeded in the following fashion. For each comparison one set of weights was used for all sub-populations, and the differences between groups were recalculated. These recalculated differences showed to what degree the labor force state composition of each group at age 50 influenced these differences. In a second step, using the method developed by Kitagawa (1955), we decomposed the differences based on the same weights into two parts: the contribution of transition probabilities and the contribution of survival probabilities.

The results are shown in table A10. The first column gives the differences in WLE for our original analysis. For instance, the 1.8-year difference between white males and females resulted from WLEs of 13.2 years and 11.3 years, respectively. The second column gives WLE recalculated using the same weights for both of the compared groups, whereby we always used the weights of the group given first in the table. For the comparison of white males and females, the first group was made up of white males, and the recalculated difference was 1.3. Columns 3 and 4 decompose this recalculated difference into the part due to mortality and the part due to differences in the transitions between labor force states.

The decomposition of gender gaps by race/ethnicity shows that the differences for blacks and Hispanics are, at first glance, due to composition, and that the re-weighted differences are close to zero. But these results mask a negative contribution of mortality due to the higher life expectancy of women, and a positive contribution of transitions, which more or less cancel each other out. The effect of mortality is found to be qualitatively similar for whites and for blacks, but the effect of labor force transitions is shown to be

higher for whites than for blacks. If white males had the same mortality patterns as white females, the re-weighted difference would have increased from 1.3 years to 1.8 years.

The largest share of racial/ethnic differences by gender is due to differences in transition probabilities between labor force states, which in all cases made a positive contribution. A comparison of the original and the re-weighted estimates of WLE shows that there were also composition effects, whereas the contribution of mortality was small compared to the overall difference. This is attributable to the fact that for all of the groups compared, mortality was relatively low at ages with high levels of labor force attachment, and that this contribution to WLE was large.

The educational differences were also mostly driven by the contribution of transition probabilities. However, in contrast to the racial/ethnic differences within sexes, mortality made consistently positive contributions to the WLE differences, thus reinforcing the impact of labor force participation differences.

## Additional tables and figures

This section includes detailed tables and additional figures, supplementing the results presented in section 3 of the paper. Table B1 shows findings for the total population. Tables B2 to B4 add to the results on racial/ethnic differences. Tables B5 to B7 show results by gender and education. Results by race/ethnicity, gender, and education are given in tables B8 to B17. Finally, tables B18 to B20 show how remaining life expectancy at age 50 is distributed among work, retirement, and being out of the labor force. Results not accounting for any of these dimensions (race/ethnicity; gender; education) and relating to the total population are available upon request from the authors. Confidence intervals are given only for a few selected quantities to keep the number of results manageable. As discussed in the main text the sample size of some groups is small, especially for blacks and Hispanics with college/university degree.

**Table B1:** Remaining life expectancy at age 50, working life expectancy at age 50, and proportion of remaining life expectancy spent working; total;

|                                            | 1995  | 2000  | 2005  | 2010  |
|--------------------------------------------|-------|-------|-------|-------|
| <i>Males</i>                               |       |       |       |       |
| Life expectancy at age 50                  | 26.7  | 27.9  | 28.5  | 29.5  |
| Working life expectancy at age 50          | 14.5  | 13.1  | 14.2  | 12.7  |
| 95% Confidence interval, lower bound       | 14.1  | 12.7  | 13.8  | 12.1  |
| 95% Confidence interval, upper bound       | 14.9  | 13.5  | 14.7  | 13.2  |
| % of life expectancy spent working         | 54.1% | 47.1% | 50.0% | 42.9% |
| 95% Confidence interval, lower bound       | 52.6% | 45.6% | 48.4% | 41.1% |
| 95% Confidence interval, upper bound       | 55.9% | 48.4% | 51.6% | 44.8% |
| <i>Females</i>                             |       |       |       |       |
| Life expectancy at age 50                  | 31.3  | 31.7  | 32.2  | 33.1  |
| Working life expectancy at age 50          | 11.4  | 10.6  | 11.4  | 10.9  |
| 95% confidence interval, lower bound       | 11.0  | 10.2  | 11.0  | 10.4  |
| 95% confidence interval, upper bound       | 11.9  | 10.9  | 11.9  | 11.4  |
| % of life expectancy spent working         | 36.5% | 33.3% | 35.5% | 33.0% |
| 95% confidence interval, lower bound       | 35.2% | 32.1% | 34.1% | 31.4% |
| 95% confidence interval, upper bound       | 38.0% | 34.5% | 37.1% | 34.5% |
| <i>Difference relative WLE male/female</i> | 17.7% | 13.8% | 14.5% | 9.9%  |

**Table B2:** Remaining life expectancy at age 50, working life expectancy at age 50, and proportion of remaining life expectancy spent working; whites;

|                                            | 1995  | 2000  | 2005  | 2010  |
|--------------------------------------------|-------|-------|-------|-------|
| <i>White males</i>                         |       |       |       |       |
| Life expectancy at age 50                  | 27.1  | 28.2  | 28.8  | 29.7  |
| Working life expectancy at age 50          | 15.1  | 13.5  | 14.8  | 13.2  |
| 95% confidence interval, lower bound       | 14.7  | 13.1  | 14.2  | 12.6  |
| 95% confidence interval, upper bound       | 15.6  | 14.0  | 15.3  | 13.8  |
| % of life expectancy spent working         | 56.0% | 48.1% | 51.3% | 44.3% |
| 95% confidence interval, lower bound       | 54.2% | 46.6% | 49.3% | 42.3% |
| 95% confidence interval, upper bound       | 57.8% | 49.6% | 53.0% | 46.6% |
| <i>White females</i>                       |       |       |       |       |
| Life expectancy at age 50                  | 31.5  | 31.9  | 32.4  | 33.2  |
| Working life expectancy at age 50          | 11.8  | 11.1  | 12.0  | 11.3  |
| 95% confidence interval, lower bound       | 11.3  | 10.7  | 11.5  | 10.7  |
| 95% confidence interval, upper bound       | 12.3  | 11.6  | 12.6  | 11.9  |
| % of life expectancy spent working         | 37.3% | 34.8% | 37.2% | 34.1% |
| 95% confidence interval, lower bound       | 35.9% | 33.5% | 35.6% | 32.1% |
| 95% confidence interval, upper bound       | 38.9% | 36.3% | 39.0% | 35.9% |
| <i>Difference</i> relative WLE male/female | 18.7% | 13.2% | 14.1% | 10.2% |

**Table B3:** Remaining life expectancy at age 50, working life expectancy at age 50, and proportion of remaining life expectancy spent working; blacks;

|                                            | 1995  | 2000  | 2005  | 2010  |
|--------------------------------------------|-------|-------|-------|-------|
| <i>Black males</i>                         |       |       |       |       |
| Life expectancy at age 50                  | 22.7  | 24.2  | 24.9  | 26.6  |
| Working life expectancy at age 50          | 10.5  | 9.0   | 10.8  | 9.1   |
| 95% confidence interval, lower bound       | 9.3   | 7.9   | 9.4   | 7.7   |
| 95% confidence interval, upper bound       | 11.8  | 10.1  | 12.2  | 10.5  |
| % of life expectancy spent working         | 46.3% | 37.2% | 43.4% | 34.1% |
| 95% confidence interval, lower bound       | 41.2% | 32.5% | 37.6% | 28.8% |
| 95% confidence interval, upper bound       | 52.2% | 41.5% | 49.0% | 39.6% |
| <i>Black females</i>                       |       |       |       |       |
| Life expectancy at age 50                  | 28.1  | 28.8  | 29.7  | 31.0  |
| Working life expectancy at age 50          | 10.3  | 9.0   | 9.6   | 8.8   |
| 95% confidence interval, lower bound       | 9.3   | 8.0   | 8.6   | 7.7   |
| 95% confidence interval, upper bound       | 11.4  | 10.0  | 10.7  | 9.9   |
| % of life expectancy spent working         | 36.6% | 31.1% | 32.5% | 28.2% |
| 95% confidence interval, lower bound       | 33.2% | 27.6% | 28.8% | 24.7% |
| 95% confidence interval, upper bound       | 40.4% | 34.6% | 36.0% | 32.0% |
| <i>Difference</i> relative WLE male/female | 9.7%  | 6.2%  | 11.0% | 5.9%  |

**Table B4:** Remaining life expectancy at age 50, working life expectancy at age 50, and proportion of remaining life expectancy spent working; Hispanics;

|                                            | 1995  | 2000  | 2005  | 2010  |
|--------------------------------------------|-------|-------|-------|-------|
| <i>Hispanic males</i>                      |       |       |       |       |
| Life expectancy at age 50                  | 29.2  | 30.3  | 31.1  | 31.4  |
| Working life expectancy at age 50          | 12.2  | 12.5  | 12.8  | 10.3  |
| 95% confidence interval, lower bound       | 10.8  | 10.9  | 11.5  | 8.7   |
| 95% confidence interval, upper bound       | 13.8  | 14.0  | 14.3  | 12.2  |
| % of life expectancy spent working         | 41.7% | 41.2% | 41.1% | 32.9% |
| 95% confidence interval, lower bound       | 37.1% | 35.8% | 36.9% | 27.9% |
| 95% confidence interval, upper bound       | 47.1% | 46.2% | 46.0% | 38.9% |
| <i>Hispanic females</i>                    |       |       |       |       |
| Life expectancy at age 50                  | 33.2  | 33.8  | 34.7  | 35.2  |
| Working life expectancy at age 50          | 9.1   | 7.8   | 7.9   | 9.2   |
| 95% confidence interval, lower bound       | 7.9   | 6.4   | 6.7   | 7.7   |
| 95% confidence interval, upper bound       | 10.6  | 9.1   | 9.2   | 10.8  |
| % of life expectancy spent working         | 27.5% | 23.0% | 22.7% | 26.2% |
| 95% confidence interval, lower bound       | 23.8% | 19.1% | 19.4% | 21.8% |
| 95% confidence interval, upper bound       | 32.0% | 27.0% | 26.6% | 30.7% |
| <i>Difference</i> relative WLE male/female | 14.2% | 18.2% | 18.4% | 6.7%  |

**Table B5:** Remaining life expectancy at age 50, working life expectancy at age 50, and proportion of remaining life expectancy spent working; less than high school degree

|                                              | 1995  | 2000  | 2005  | 2010  |
|----------------------------------------------|-------|-------|-------|-------|
| <i>Less than high school degree, males</i>   |       |       |       |       |
| Life expectancy at age 50                    | 25.2  | 25.0  | 25.4  | 25.8  |
| Working life expectancy at age 50            | 11.1  | 10.5  | 10.0  | 8.6   |
| 95% confidence interval, lower bound         | 10.3  | 9.7   | 9.1   | 7.6   |
| 95% confidence interval, upper bound         | 12.1  | 11.3  | 11.1  | 9.8   |
| % of life expectancy spent working           | 44.2% | 42.0% | 39.4% | 33.4% |
| 95% confidence interval, lower bound         | 41.4% | 38.4% | 35.3% | 29.2% |
| 95% confidence interval, upper bound         | 47.6% | 44.5% | 43.0% | 38.0% |
| <i>Less than high school degree, females</i> |       |       |       |       |
| Life expectancy at age 50                    | 29.9  | 29.5  | 29.4  | 30.6  |
| Working life expectancy at age 50            | 8.0   | 6.0   | 6.3   | 6.9   |
| 95% confidence interval, lower bound         | 8.1   | 6.2   | 6.3   | 6.7   |
| 95% confidence interval, upper bound         | 9.7   | 7.6   | 7.9   | 8.8   |
| % of life expectancy spent working           | 26.6% | 20.5% | 21.3% | 22.7% |
| 95% confidence interval, lower bound         | 27.4% | 21.2% | 21.7% | 22.1% |
| 95% confidence interval, upper bound         | 32.5% | 25.6% | 27.1% | 28.8% |
| <i>Difference</i> relative WLE male/female   | 17.6% | 21.5% | 18.1% | 10.7% |

**Table B6:** Remaining life expectancy at age 50, working life expectancy at age 50, and proportion of remaining life expectancy spent working; high school/GED

|                                            | 1995  | 2000  | 2005  | 2010  |
|--------------------------------------------|-------|-------|-------|-------|
| <i>High school/GED, males</i>              |       |       |       |       |
| Life expectancy at age 50                  | 26.6  | 27.6  | 28.1  | 29.5  |
| Working life expectancy at age 50          | 13.6  | 12.2  | 12.9  | 12.1  |
| 95% confidence interval, lower bound       | 12.9  | 11.5  | 12.1  | 11.3  |
| 95% confidence interval, upper bound       | 14.3  | 12.7  | 13.4  | 12.8  |
| % of life expectancy spent working         | 51.0% | 44.1% | 45.7% | 40.9% |
| 95% confidence interval, lower bound       | 48.6% | 41.8% | 43.3% | 38.2% |
| 95% confidence interval, upper bound       | 53.5% | 46.0% | 47.7% | 43.6% |
| <i>High school/GED, females</i>            |       |       |       |       |
| Life expectancy at age 50                  | 31.3  | 32.0  | 32.6  | 33.3  |
| Working life expectancy at age 50          | 10.7  | 10.1  | 11.1  | 10.2  |
| 95% confidence interval, lower bound       | 10.8  | 10.3  | 11.2  | 10.2  |
| 95% confidence interval, upper bound       | 12.0  | 11.3  | 12.4  | 11.7  |
| % of life expectancy spent working         | 34.0% | 31.5% | 33.9% | 30.8% |
| 95% confidence interval, lower bound       | 34.5% | 32.3% | 34.6% | 30.9% |
| 95% confidence interval, upper bound       | 38.5% | 35.6% | 38.2% | 35.2% |
| <i>Difference</i> relative WLE male/female | 17.0% | 12.6% | 11.8% | 10.2% |

**Table B7:** Remaining life expectancy at age 50, working life expectancy at age 50, and proportion of remaining life expectancy spent working; college/university

|                                            | 1995  | 2000  | 2005  | 2010  |
|--------------------------------------------|-------|-------|-------|-------|
| <i>College/university, males</i>           |       |       |       |       |
| Life expectancy at age 50                  | 28.3  | 30.7  | 31.7  | 32.7  |
| Working life expectancy at age 50          | 17.1  | 14.8  | 18.7  | 15.4  |
| 95% confidence interval, lower bound       | 16.0  | 13.9  | 17.6  | 14.4  |
| 95% confidence interval, upper bound       | 18.3  | 15.6  | 19.5  | 16.4  |
| % of life expectancy spent working         | 60.5% | 48.3% | 59.1% | 47.1% |
| 95% confidence interval, lower bound       | 56.5% | 45.5% | 56.1% | 44.2% |
| 95% confidence interval, upper bound       | 64.2% | 51.1% | 61.8% | 50.3% |
| <i>College/university, females</i>         |       |       |       |       |
| Life expectancy at age 50                  | 32.8  | 33.5  | 34.4  | 35.6  |
| Working life expectancy at age 50          | 12.1  | 12.2  | 14.0  | 12.4  |
| 95% confidence interval, lower bound       | 11.7  | 12.0  | 13.6  | 12.1  |
| 95% confidence interval, upper bound       | 14.0  | 13.8  | 15.6  | 14.0  |
| % of life expectancy spent working         | 36.9% | 36.5% | 40.6% | 34.8% |
| 95% confidence interval, lower bound       | 35.8% | 35.9% | 39.9% | 34.3% |
| 95% confidence interval, upper bound       | 42.6% | 41.5% | 45.7% | 39.8% |
| <i>Difference</i> relative WLE male/female | 23.6% | 11.8% | 18.5% | 12.3% |

**Table B8:** Remaining life expectancy at age 50 by race/ethnicity, gender, and education

|                  |                              | 1995 | 2000 | 2005 | 2010 |
|------------------|------------------------------|------|------|------|------|
| White males      | less than high school degree | 25.0 | 24.1 | 24.8 | 24.4 |
|                  | high school degree           | 26.8 | 28.1 | 28.4 | 29.6 |
|                  | college/university degree    | 28.7 | 30.7 | 31.8 | 33.0 |
| White females    | less than high school degree | 30.0 | 29.5 | 28.9 | 29.8 |
|                  | high school degree           | 31.4 | 32.0 | 32.7 | 33.4 |
|                  | college/university degree    | 33.2 | 33.9 | 34.6 | 35.7 |
| Black males      | less than high school degree | 23.0 | 23.4 | 22.8 | 23.0 |
|                  | high school degree           | 22.7 | 22.8 | 25.4 | 28.8 |
|                  | college/university degree    | 21.7 | 31.2 | 29.8 | 30.7 |
| Black females    | less than high school degree | 27.0 | 27.4 | 28.6 | 30.1 |
|                  | high school degree           | 29.1 | 30.3 | 30.1 | 31.3 |
|                  | college/university degree    | 28.1 | 28.3 | 31.5 | 32.7 |
| Hispanic males   | less than high school degree | 28.6 | 30.2 | 31.0 | 31.2 |
|                  | high school degree           | 29.5 | 29.2 | 31.9 | 31.2 |
|                  | college/university degree    | 31.3 | 33.9 | 29.1 | 32.6 |
| Hispanic females | less than high school degree | 33.9 | 32.3 | 33.3 | 33.1 |
|                  | high school degree           | 32.8 | 37.6 | 37.8 | 38.6 |
|                  | college/university degree    | 29.6 | 30.6 | 34.0 | 39.4 |

**Table B9:** Remaining life expectancy at age 50, working life expectancy at age 50, and proportion of remaining life expectancy spent working; whites, less than high school degree;

|                                                    | 1995  | 2000  | 2005  | 2010  |
|----------------------------------------------------|-------|-------|-------|-------|
| <i>White males, less than high school degree</i>   |       |       |       |       |
| Life expectancy at age 50                          | 25.0  | 24.1  | 24.8  | 24.4  |
| Working life expectancy at age 50                  | 11.8  | 10.4  | 10.0  | 7.9   |
| 95% confidence interval, lower bound               | 10.7  | 9.4   | 8.6   | 6.5   |
| 95% confidence interval, upper bound               | 13.1  | 11.7  | 11.6  | 9.8   |
| % of life expectancy spent working                 | 47.1% | 43.3% | 40.5% | 32.3% |
| 95% confidence interval, lower bound               | 43.3% | 38.6% | 34.2% | 26.2% |
| 95% confidence interval, upper bound               | 51.4% | 47.5% | 45.5% | 39.4% |
| <i>White females, less than high school degree</i> |       |       |       |       |
| Life expectancy at age 50                          | 30.0  | 29.5  | 28.9  | 29.8  |
| Working life expectancy at age 50                  | 8.5   | 6.2   | 6.5   | 6.4   |
| 95% confidence interval, lower bound               | 7.4   | 5.3   | 5.5   | 4.9   |
| 95% confidence interval, upper bound               | 9.7   | 7.2   | 7.9   | 8.2   |
| % of life expectancy spent working                 | 28.3% | 20.9% | 22.6% | 21.6% |
| 95% confidence interval, lower bound               | 24.9% | 18.1% | 19.0% | 16.3% |
| 95% confidence interval, upper bound               | 32.2% | 24.3% | 27.1% | 27.0% |
| <i>Difference relative WLE male/female</i>         | 18.8% | 22.4% | 17.9% | 10.7% |

**Table B10:** Remaining life expectancy at age 50, working life expectancy at age 50, and proportion of remaining life expectancy spent working; whites, high school degree/GED;

|                                              | 1995  | 2000  | 2005  | 2010  |
|----------------------------------------------|-------|-------|-------|-------|
| <i>White males, high school degree/GED</i>   |       |       |       |       |
| Life expectancy at age 50                    | 26.8  | 28.1  | 28.4  | 29.6  |
| Working life expectancy at age 50            | 14.4  | 13.0  | 13.6  | 13.2  |
| 95% confidence interval, lower bound         | 13.7  | 12.4  | 12.9  | 12.3  |
| 95% confidence interval, upper bound         | 15.2  | 13.6  | 14.3  | 14.1  |
| % of life expectancy spent working           | 53.8% | 46.4% | 48.0% | 44.6% |
| 95% confidence interval, lower bound         | 51.2% | 44.2% | 45.7% | 41.8% |
| 95% confidence interval, upper bound         | 56.4% | 48.5% | 50.3% | 47.5% |
| <i>White females, high school degree/GED</i> |       |       |       |       |
| Life expectancy at age 50                    | 31.4  | 32.0  | 32.7  | 33.4  |
| Working life expectancy at age 50            | 11.7  | 11.4  | 12.2  | 11.5  |
| 95% confidence interval, lower bound         | 11.0  | 10.8  | 11.5  | 10.6  |
| 95% confidence interval, upper bound         | 12.3  | 11.9  | 12.9  | 12.3  |
| % of life expectancy spent working           | 37.1% | 35.5% | 37.3% | 34.3% |
| 95% confidence interval, lower bound         | 35.2% | 33.9% | 35.4% | 31.8% |
| 95% confidence interval, upper bound         | 39.1% | 37.3% | 39.4% | 36.6% |
| <i>Difference relative WLE male/female</i>   | 16.7% | 10.9% | 10.7% | 10.3% |

**Table B11:** Remaining life expectancy at age 50, working life expectancy at age 50, and proportion of remaining life expectancy spent working; whites, college/university degree;

|                                                 | 1995  | 2000  | 2005  | 2010  |
|-------------------------------------------------|-------|-------|-------|-------|
| <i>White males, college/university degree</i>   |       |       |       |       |
| Life expectancy at age 50                       | 28.7  | 30.7  | 31.8  | 33.0  |
| Working life expectancy at age 50               | 17.9  | 15.8  | 19.4  | 16.3  |
| 95% confidence interval, lower bound            | 16.8  | 14.8  | 18.2  | 15.3  |
| 95% confidence interval, upper bound            | 19.2  | 16.6  | 20.3  | 17.3  |
| % of life expectancy spent working              | 62.5% | 51.6% | 61.0% | 49.3% |
| 95% confidence interval, lower bound            | 58.6% | 48.7% | 58.0% | 46.4% |
| 95% confidence interval, upper bound            | 66.3% | 54.5% | 64.0% | 52.9% |
| <i>White females, college/university degree</i> |       |       |       |       |
| Life expectancy at age 50                       | 33.2  | 33.9  | 34.6  | 35.7  |
| Working life expectancy at age 50               | 13.6  | 13.8  | 15.6  | 14.4  |
| 95% confidence interval, lower bound            | 12.5  | 12.8  | 14.5  | 13.2  |
| 95% confidence interval, upper bound            | 14.9  | 14.7  | 16.7  | 15.4  |
| % of life expectancy spent working              | 40.9% | 40.5% | 45.3% | 40.2% |
| 95% confidence interval, lower bound            | 37.4% | 37.6% | 42.1% | 37.3% |
| 95% confidence interval, upper bound            | 44.8% | 43.1% | 48.2% | 43.3% |
| <i>Difference relative WLE male/female</i>      | 21.6% | 11.0% | 15.7% | 9.1%  |



**Table B12:** Remaining life expectancy at age 50, working life expectancy at age 50, and proportion of remaining life expectancy spent working; blacks, less than high school degree;

|                                                    | 1995  | 2000  | 2005  | 2010  |
|----------------------------------------------------|-------|-------|-------|-------|
| <i>Black males, less than high school degree</i>   |       |       |       |       |
| Life expectancy at age 50                          | 23.0  | 23.4  | 22.8  | 23.0  |
| Working life expectancy at age 50                  | 8.5   | 8.3   | 7.6   | 7.5   |
| 95% confidence interval, lower bound               | 7.0   | 6.6   | 5.9   | 5.6   |
| 95% confidence interval, upper bound               | 10.2  | 9.8   | 9.8   | 9.9   |
| % of life expectancy spent working                 | 37.2% | 35.6% | 33.5% | 32.5% |
| 95% confidence interval, lower bound               | 31.1% | 27.7% | 25.2% | 23.2% |
| 95% confidence interval, upper bound               | 44.0% | 41.7% | 42.0% | 42.0% |
| <i>Black females, less than high school degree</i> |       |       |       |       |
| Life expectancy at age 50                          | 27.0  | 27.4  | 28.6  | 30.1  |
| Working life expectancy at age 50                  | 7.1   | 6.0   | 5.9   | 5.9   |
| 95% confidence interval, lower bound               | 5.9   | 4.7   | 4.4   | 4.2   |
| 95% confidence interval, upper bound               | 8.6   | 7.6   | 7.6   | 7.9   |
| % of life expectancy spent working                 | 26.3% | 22.0% | 20.6% | 19.7% |
| 95% confidence interval, lower bound               | 22.1% | 16.9% | 15.4% | 13.9% |
| 95% confidence interval, upper bound               | 31.6% | 27.2% | 26.4% | 26.5% |
| <i>Difference relative WLE male/female</i>         | 10.8% | 13.6% | 12.9% | 12.8% |

**Table B13:** Remaining life expectancy at age 50, working life expectancy at age 50, and proportion of remaining life expectancy spent working; blacks, high school degree/GED;

|                                              | 1995  | 2000  | 2005  | 2010  |
|----------------------------------------------|-------|-------|-------|-------|
| <i>Black males, high school degree/GED</i>   |       |       |       |       |
| Life expectancy at age 50                    | 22.7  | 22.8  | 25.4  | 28.8  |
| Working life expectancy at age 50            | 10.9  | 9.2   | 11.5  | 8.2   |
| 95% confidence interval, lower bound         | 9.3   | 7.5   | 9.0   | 6.4   |
| 95% confidence interval, upper bound         | 12.9  | 10.8  | 13.5  | 9.9   |
| % of life expectancy spent working           | 48.2% | 40.2% | 45.2% | 28.5% |
| 95% confidence interval, lower bound         | 41.2% | 31.9% | 36.3% | 22.7% |
| 95% confidence interval, upper bound         | 56.3% | 46.7% | 53.0% | 35.1% |
| <i>Black females, high school degree/GED</i> |       |       |       |       |
| Life expectancy at age 50                    | 29.1  | 30.3  | 30.1  | 31.3  |
| Working life expectancy at age 50            | 11.3  | 10.0  | 10.9  | 9.9   |
| 95% confidence interval, lower bound         | 9.8   | 8.5   | 9.5   | 8.3   |
| 95% confidence interval, upper bound         | 13.0  | 11.5  | 12.2  | 11.3  |
| % of life expectancy spent working           | 38.9% | 33.1% | 36.2% | 31.5% |
| 95% confidence interval, lower bound         | 33.8% | 28.2% | 31.7% | 26.4% |
| 95% confidence interval, upper bound         | 44.9% | 38.3% | 40.6% | 36.0% |
| <i>Difference relative WLE male/female</i>   | 9.4%  | 7.1%  | 9.0%  | -3.0% |

**Table B14:** Remaining life expectancy at age 50, working life expectancy at age 50, and proportion of remaining life expectancy spent working; blacks, college/university degree;

|                                                 | 1995  | 2000   | 2005  | 2010  |
|-------------------------------------------------|-------|--------|-------|-------|
| <i>Black males, college/university degree</i>   |       |        |       |       |
| Life expectancy at age 50                       | 21.7  | 31.2   | 29.8  | 30.7  |
| Working life expectancy at age 50               | 15.0  | 9.1    | 19.1  | 17.6  |
| 95% confidence interval, lower bound            | 10.2  | 6.1    | 15.5  | 13.1  |
| 95% confidence interval, upper bound            | 21.1  | 12.8   | 22.6  | 21.1  |
| % of life expectancy spent working              | 69.2% | 29.2%  | 64.1% | 57.4% |
| 95% confidence interval, lower bound            | 48.8% | 20.3%  | 53.5% | 45.3% |
| 95% confidence interval, upper bound            | 86.2% | 43.3%  | 75.6% | 69.9% |
| <i>Black females, college/university degree</i> |       |        |       |       |
| Life expectancy at age 50                       | 28.1  | 28.3   | 31.5  | 32.7  |
| Working life expectancy at age 50               | 13.3  | 11.2   | 13.8  | 10.3  |
| 95% confidence interval, lower bound            | 10.2  | 8.7    | 11.1  | 8.3   |
| 95% confidence interval, upper bound            | 16.8  | 13.9   | 16.9  | 12.4  |
| % of life expectancy spent working              | 47.3% | 39.5%  | 43.8% | 31.5% |
| 95% confidence interval, lower bound            | 37.3% | 30.3%  | 35.5% | 25.3% |
| 95% confidence interval, upper bound            | 58.8% | 49.3%  | 54.2% | 38.2% |
| <i>Difference relative WLE male/female</i>      | 22.0% | -10.2% | 20.3% | 25.9% |

**Table B15:** Remaining life expectancy at age 50, working life expectancy at age 50, and proportion of remaining life expectancy spent working; Hispanics, less than high school degree;

|                                                       | 1995  | 2000  | 2005  | 2010  |
|-------------------------------------------------------|-------|-------|-------|-------|
| <i>Hispanic males, less than high school degree</i>   |       |       |       |       |
| Life expectancy at age 50                             | 28.6  | 30.2  | 31.0  | 31.2  |
| Working life expectancy at age 50                     | 10.5  | 10.9  | 10.5  | 8.9   |
| 95% confidence interval, lower bound                  | 8.9   | 9.1   | 8.6   | 7.0   |
| 95% confidence interval, upper bound                  | 12.6  | 12.5  | 12.5  | 11.4  |
| % of life expectancy spent working                    | 36.8% | 36.2% | 33.7% | 28.6% |
| 95% confidence interval, lower bound                  | 31.0% | 30.1% | 27.5% | 22.3% |
| 95% confidence interval, upper bound                  | 44.7% | 42.0% | 40.8% | 36.7% |
| <i>Hispanic females, less than high school degree</i> |       |       |       |       |
| Life expectancy at age 50                             | 33.9  | 32.3  | 33.3  | 33.1  |
| Working life expectancy at age 50                     | 7.3   | 5.8   | 5.4   | 7.3   |
| 95% confidence interval, lower bound                  | 5.8   | 4.3   | 4.2   | 5.3   |
| 95% confidence interval, upper bound                  | 9.1   | 7.1   | 6.9   | 9.4   |
| % of life expectancy spent working                    | 21.7% | 17.9% | 16.2% | 22.0% |
| 95% confidence interval, lower bound                  | 17.3% | 13.2% | 12.5% | 15.9% |
| 95% confidence interval, upper bound                  | 27.1% | 22.1% | 20.7% | 28.2% |
| <i>Difference relative WLE male/female</i>            | 15.1% | 18.3% | 17.5% | 6.6%  |

**Table B16:** Remaining life expectancy at age 50, working life expectancy at age 50, and proportion of remaining life expectancy spent working; Hispanics, high school degree/GED;

|                                                 | 1995  | 2000  | 2005  | 2010  |
|-------------------------------------------------|-------|-------|-------|-------|
| <i>Hispanic males, high school degree/GED</i>   |       |       |       |       |
| Life expectancy at age 50                       | 29.5  | 29.2  | 31.9  | 31.2  |
| Working life expectancy at age 50               | 12.5  | 12.5  | 13.5  | 11.0  |
| 95% confidence interval, lower bound            | 9.9   | 9.0   | 11.4  | 8.2   |
| 95% confidence interval, upper bound            | 15.6  | 15.8  | 15.9  | 13.9  |
| % of life expectancy spent working              | 42.4% | 42.6% | 42.3% | 35.3% |
| 95% confidence interval, lower bound            | 33.5% | 30.3% | 35.3% | 26.1% |
| 95% confidence interval, upper bound            | 53.0% | 54.6% | 50.6% | 45.0% |
| <i>Hispanic females, high school degree/GED</i> |       |       |       |       |
| Life expectancy at age 50                       | 32.8  | 37.6  | 37.8  | 38.6  |
| Working life expectancy at age 50               | 11.4  | 9.7   | 11.8  | 11.2  |
| 95% confidence interval, lower bound            | 9.4   | 7.5   | 9.3   | 8.9   |
| 95% confidence interval, upper bound            | 14.2  | 12.0  | 14.4  | 13.6  |
| % of life expectancy spent working              | 34.7% | 25.6% | 31.3% | 29.1% |
| 95% confidence interval, lower bound            | 27.6% | 20.0% | 24.8% | 23.4% |
| 95% confidence interval, upper bound            | 45.0% | 32.7% | 39.0% | 35.9% |
| <i>Difference relative WLE male/female</i>      | 7.8%  | 17.0% | 11.0% | 6.2%  |

**Table B17:** Remaining life expectancy at age 50, working life expectancy at age 50, and proportion of remaining life expectancy spent working; Hispanics, college/university degree;

|                                                    | 1995  | 2000  | 2005  | 2010  |
|----------------------------------------------------|-------|-------|-------|-------|
| <i>Hispanic males, college/university degree</i>   |       |       |       |       |
| Life expectancy at age 50                          | 31.3  | 33.9  | 29.1  | 32.6  |
| Working life expectancy at age 50                  | 16.1  | 17.0  | 19.4  | 14.3  |
| 95% confidence interval, lower bound               | 11.8  | 13.1  | 15.8  | 11.7  |
| 95% confidence interval, upper bound               | 22.1  | 20.8  | 22.7  | 17.6  |
| % of life expectancy spent working                 | 51.4% | 50.1% | 66.5% | 43.9% |
| 95% confidence interval, lower bound               | 36.4% | 37.7% | 51.1% | 34.4% |
| 95% confidence interval, upper bound               | 69.0% | 65.0% | 78.4% | 57.0% |
| <i>Hispanic females, college/university degree</i> |       |       |       |       |
| Life expectancy at age 50                          | 29.6  | 30.6  | 34.0  | 39.4  |
| Working life expectancy at age 50                  | 10.2  | 14.1  | 10.7  | 12.9  |
| 95% confidence interval, lower bound               | 7.3   | 9.8   | 7.9   | 9.1   |
| 95% confidence interval, upper bound               | 13.6  | 19.4  | 14.1  | 16.8  |
| % of life expectancy spent working                 | 34.4% | 46.1% | 31.4% | 32.7% |
| 95% confidence interval, lower bound               | 21.5% | 28.3% | 22.0% | 23.2% |
| 95% confidence interval, upper bound               | 48.8% | 61.8% | 43.6% | 44.1% |
| <i>Difference relative WLE male/female</i>         | 16.9% | 4.0%  | 35.1% | 11.2% |

**Table B18:** Decomposition of life expectancy into working life expectancy, life expectancy in retirement, and life expectancy out of the labor force; whites by gender and education

|                                                    | 1995 | 2000 | 2005 | 2010 |
|----------------------------------------------------|------|------|------|------|
| <i>Less than high school degree, white males</i>   |      |      |      |      |
| Working life expectancy                            | 11.8 | 10.4 | 10.0 | 7.9  |
| Life expectancy in retirement                      | 10.0 | 9.8  | 10.5 | 11.1 |
| Life expectancy out of the labor force             | 3.3  | 3.8  | 4.3  | 5.4  |
| <i>Less than high school degree, white females</i> |      |      |      |      |
| Working life expectancy                            | 8.5  | 6.2  | 6.5  | 6.4  |
| Life expectancy in retirement                      | 14.0 | 14.4 | 13.2 | 15.0 |
| Life expectancy out of the labor force             | 7.6  | 8.9  | 9.2  | 8.3  |
| <i>High school, white males</i>                    |      |      |      |      |
| Working life expectancy                            | 14.4 | 13.0 | 13.6 | 13.2 |
| Life expectancy in retirement                      | 10.7 | 12.9 | 12.4 | 13.5 |
| Life expectancy out of the labor force             | 1.7  | 2.1  | 2.3  | 2.9  |
| <i>High school, white females</i>                  |      |      |      |      |
| Working life expectancy                            | 11.7 | 11.4 | 12.2 | 11.5 |
| Life expectancy in retirement                      | 15.1 | 16.0 | 15.8 | 17.3 |
| Life expectancy out of the labor force             | 4.7  | 4.6  | 4.7  | 4.7  |
| <i>College, white males</i>                        |      |      |      |      |
| Working life expectancy                            | 17.9 | 15.8 | 19.4 | 16.3 |
| Life expectancy in retirement                      | 10.0 | 13.6 | 11.4 | 14.9 |
| Life expectancy out of the labor force             | 0.8  | 1.3  | 1.0  | 1.9  |
| <i>College, white females</i>                      |      |      |      |      |
| Working life expectancy                            | 13.6 | 13.8 | 15.6 | 14.4 |
| Life expectancy in retirement                      | 16.8 | 17.6 | 16.1 | 18.5 |
| Life expectancy out of the labor force             | 2.8  | 2.5  | 2.8  | 2.8  |

**Table B19:** Decomposition of life expectancy into working life expectancy, life expectancy in retirement, and life expectancy out of the labor force; blacks by gender and education

|                                                    | 1995 | 2000 | 2005 | 2010 |
|----------------------------------------------------|------|------|------|------|
| <i>Less than high school degree, black males</i>   |      |      |      |      |
| Working life expectancy                            | 8.5  | 8.3  | 7.6  | 7.5  |
| Life expectancy in retirement                      | 9.9  | 10.0 | 8.9  | 9.3  |
| Life expectancy out of the labor force             | 4.5  | 5.1  | 6.3  | 6.2  |
| <i>Less than high school degree, black females</i> |      |      |      |      |
| Working life expectancy                            | 7.1  | 6.0  | 5.9  | 5.9  |
| Life expectancy in retirement                      | 12.7 | 12.8 | 12.1 | 14.6 |
| Life expectancy out of the labor force             | 7.2  | 8.6  | 10.6 | 9.6  |
| <i>High school, black males</i>                    |      |      |      |      |
| Working life expectancy                            | 10.9 | 9.2  | 11.5 | 8.2  |
| Life expectancy in retirement                      | 9.1  | 9.5  | 10.1 | 15.1 |
| Life expectancy out of the labor force             | 2.7  | 4.1  | 3.8  | 5.5  |
| <i>High school, black females</i>                  |      |      |      |      |
| Working life expectancy                            | 11.3 | 10.0 | 10.9 | 9.9  |
| Life expectancy in retirement                      | 13.6 | 15.7 | 14.1 | 15.6 |
| Life expectancy out of the labor force             | 4.2  | 4.6  | 5.1  | 5.8  |
| <i>College, black males</i>                        |      |      |      |      |
| Working life expectancy                            | 15.0 | 9.1  | 19.1 | 17.6 |
| Life expectancy in retirement                      | 5.3  | 19.3 | 10.0 | 11.0 |
| Life expectancy out of the labor force             | 1.4  | 2.7  | 0.7  | 2.0  |
| <i>College, black females</i>                      |      |      |      |      |
| Working life expectancy                            | 13.3 | 11.2 | 13.8 | 10.3 |
| Life expectancy in retirement                      | 13.2 | 14.4 | 14.9 | 19.7 |
| Life expectancy out of the labor force             | 1.6  | 2.7  | 2.8  | 2.7  |

**Table B20:** Decomposition of life expectancy into working life expectancy, life expectancy in retirement, and life expectancy out of the labor force; Hispanics by gender and education

|                                                       | 1995 | 2000 | 2005 | 2010 |
|-------------------------------------------------------|------|------|------|------|
| <i>Less than high school degree, Hispanic males</i>   |      |      |      |      |
| Working life expectancy                               | 10.5 | 10.9 | 10.5 | 8.9  |
| Life expectancy in retirement                         | 13.3 | 14.2 | 14.7 | 15.5 |
| Life expectancy out of the labor force                | 4.8  | 5.1  | 5.9  | 6.9  |
| <i>Less than high school degree, Hispanic females</i> |      |      |      |      |
| Working life expectancy                               | 7.3  | 5.8  | 5.4  | 7.3  |
| Life expectancy in retirement                         | 17.2 | 16.4 | 17.1 | 16.9 |
| Life expectancy out of the labor force                | 9.4  | 10.1 | 10.8 | 8.8  |
| <i>High school, Hispanic males</i>                    |      |      |      |      |
| Working life expectancy                               | 12.5 | 12.5 | 13.5 | 11.0 |
| Life expectancy in retirement                         | 14.4 | 13.8 | 15.9 | 14.7 |
| Life expectancy out of the labor force                | 2.6  | 3.0  | 2.5  | 5.5  |
| <i>High school, Hispanic females</i>                  |      |      |      |      |
| Working life expectancy                               | 11.4 | 9.7  | 11.8 | 11.2 |
| Life expectancy in retirement                         | 16.6 | 21.6 | 21.0 | 22.8 |
| Life expectancy out of the labor force                | 4.8  | 6.4  | 5.0  | 4.5  |
| <i>College, Hispanic males</i>                        |      |      |      |      |
| Working life expectancy                               | 16.1 | 17.0 | 19.4 | 14.3 |
| Life expectancy in retirement                         | 14.1 | 15.3 | 8.1  | 15.3 |
| Life expectancy out of the labor force                | 1.1  | 1.6  | 1.6  | 3.1  |
| <i>College, Hispanic females</i>                      |      |      |      |      |
| Working life expectancy                               | 10.2 | 14.1 | 10.7 | 12.9 |
| Life expectancy in retirement                         | 17.2 | 13.6 | 18.7 | 22.6 |
| Life expectancy out of the labor force                | 2.2  | 2.9  | 4.7  | 3.9  |

## Software and code

All of the calculations were conducted using the freely available statistical software R (R Core Team 2015) and the `VGAM` and the `Biodem` packages (Boattini and Calboli 2012; Yee 2010). The figures were created using `ggplot2` (Wickham 2009). All code is available upon request from the authors. Transition matrices on which our calculations are based are available online. For researchers HRS data is available at no costs and can be obtained from <http://hrsonline.isr.umich.edu>. The website also hosts an extensive documentation.

## References

- Arias, E. (2002). United States life tables, 2000. National Vital Statistics Reports 51.
- Arias, E. (2014). United States life tables, 2010. National Vital Statistics Reports 63.
- Arias, E., Rostron, B. L., and Tejada-Vera, B. (2010). United States life tables, 2005. National Vital Statistics Reports 58.
- Boattini, A. and Calboli, F. C. F. (2012). Biodem: Biodemography functions. R package version 0.3.
- Kitagawa, E. M. (1955). Components of a difference between two rates. *Journal of the American Statistical Association*, 50:1168–1194.
- National Center for Health Statistics (1998). Vital statistics of the United States, 1995. Life tables.
- R Core Team (2015). R: A language and environment for statistical computing. Vienna, Austria.
- Wickham, H. (2009). *ggplot2: Elegant Graphics for Data Analysis*. Springer, New York.
- Yee, T. W. (2010). The VGAM package for categorical data analysis. *Journal of Statistical Software*, 32(10):1–34.
